# Supplementary material
Source: publisher figshare collection journal article supplement (https://acs.figshare.com/ndownloader/files/4583287)

**Supporting Information Available:** TGA/DSC analysis was performed following the same procedure reported in this manuscript for three commercially available Al nanopowders. These nanopowders are the Alpha Aesar, Sigma Aldrich, and MTI samples. The energy and mass dependence on temperature of these samples was recorded using a TA Instruments STD Q600 dual DSC/TGA instrument with open pan alumina sample cups. Samples were analyzed from room temperature to 700°C using a 10°C/min temperature profile under a constant flow of air. This material is available free of charge via the internet at <http://pubs.acs.org>

## Supporting Information

Figure S1. TGA/DSC data for Alfa Aesar Al nanopowder.

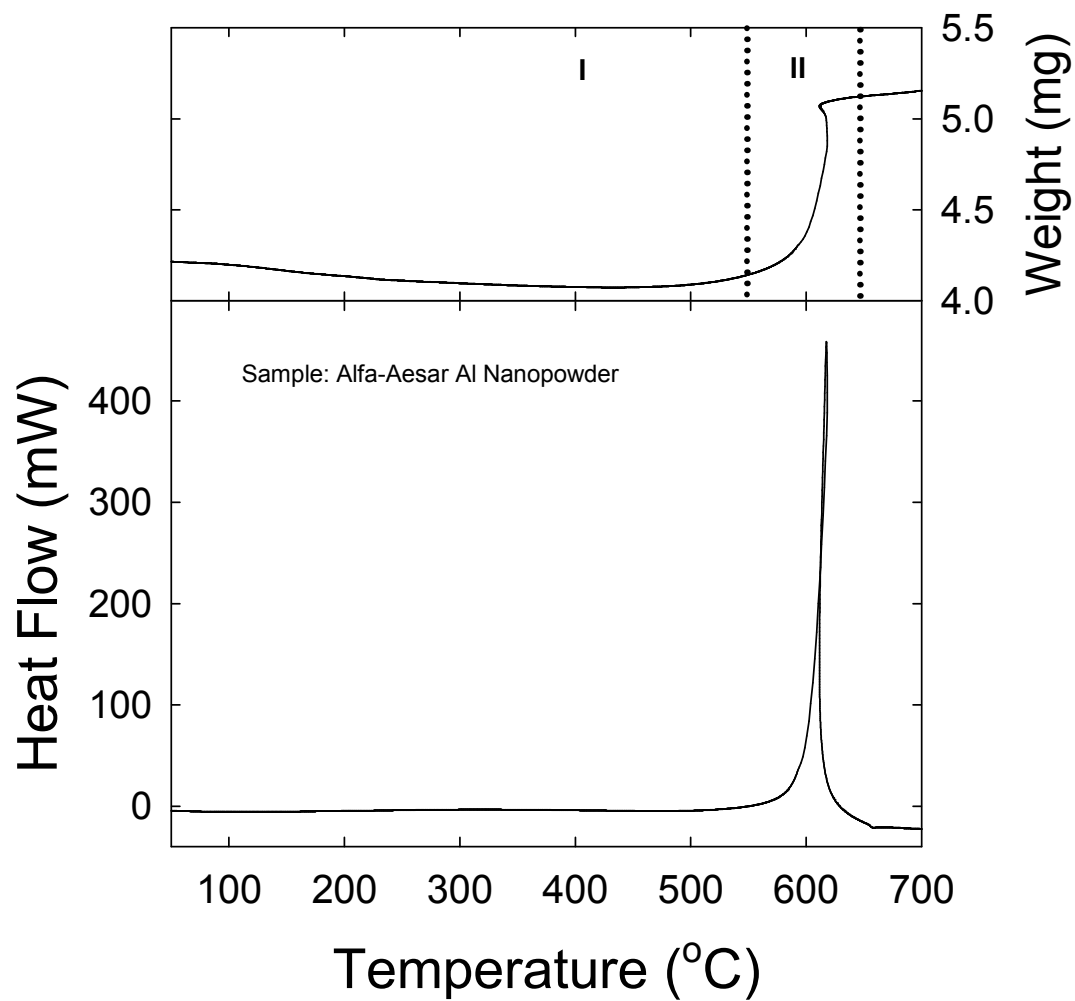

## Supporting Information

Figure S2. TGA/DSC data for Sigma Aldrich Al nanopowder.

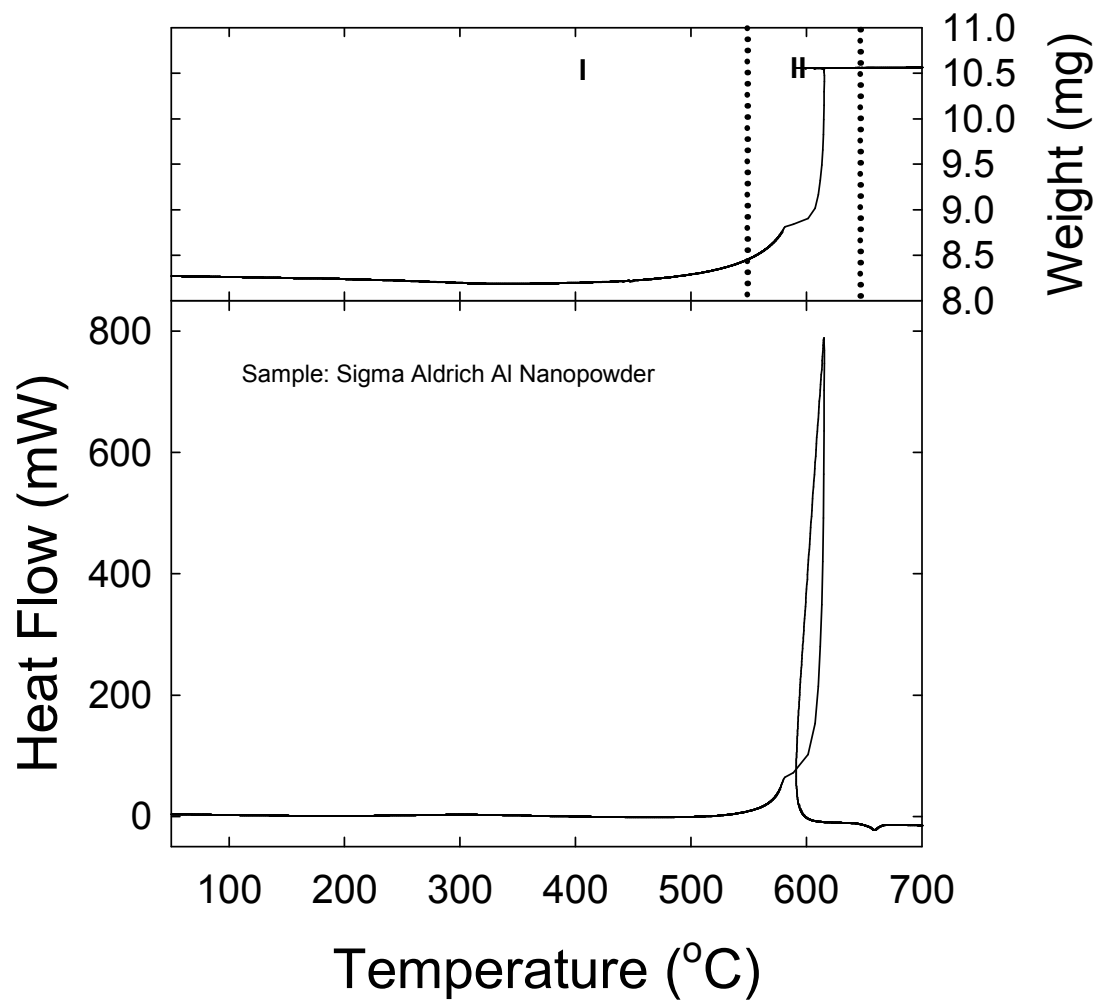

## Supporting Information

Figure S3. TGA/DSC data for MTI Al nanopowder.

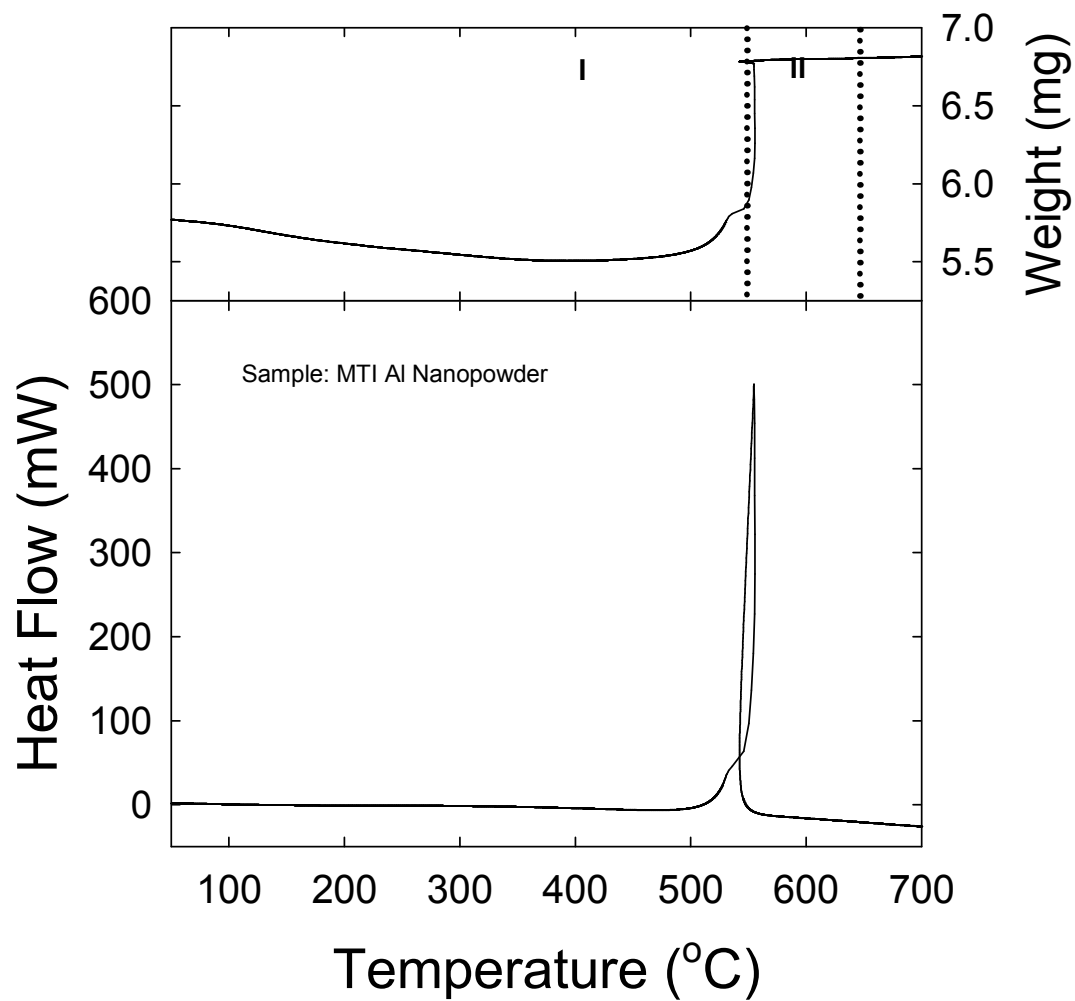

Supplement: Supplementary file 1 [file 4583287]
